# Supplementary material for: Motor Imagery Learning Modulates Functional Connectivity of Multiple Brain Systems in Resting State
Source: PubMed Central journal article supplement (PMC3894973; doi:10.1371/journal.pone.0085489), 2014-01-17
Supplement: pone.0085489.s001.pdf [file pone.0085489.s001.pdf]

**Table S1.** Regions significantly recruited in each RSN for experimental group. The RSNs identified through a single independent component analyses on the combined data of pre- and post-rest scans, were first converted to z-maps for each participant and were further tested to determine group t-maps for the experimental group,  $p < 0.005$ , FDR corrected.

| RSNs | Involved brain regions                      | L/R | BA       | Peak MNI Coordinates |     |     |                  |
|------|---------------------------------------------|-----|----------|----------------------|-----|-----|------------------|
|      |                                             |     |          | x                    | y   | z   | T <sub>max</sub> |
| LVN  | Inferior occipital gyrus/<br>fusiform gyrus | L   | 19/20/37 | -36                  | -79 | -10 | 20.91            |
|      | Inferior occipital gyrus/<br>fusiform gyrus | R   | 19/20/37 | 33                   | -76 | -14 | 20.37            |
| MVN  | Visual cortex                               | L/R | 17/18    | 6                    | -85 | -10 | 20.45            |
| AN   | Superior temporal gyrus                     | L   | 22/42    | -45                  | -19 | 6   | 28.50            |
|      | Superior temporal gyrus                     | R   | 22/42    | 57                   | -4  | 2   | 28.71            |
| SMN  | Postcentral gyrus,                          | L   | 3/4      | -30                  | -34 | 58  | 11.52            |
|      | Postcentral gyrus                           | R   | 3/4      | 33                   | -31 | 54  | 12.23            |
|      | Precentral gyrus                            | L   | 6        | -30                  | -10 | 54  | 12.40            |
|      | Precentral gyrus                            | R   | 6        | 33                   | -10 | 54  | 9.25             |
|      | Posterior parietal lobe/<br>Precuneus       | L   | 7        | -12                  | -55 | 66  | 12.69            |
|      | Posterior parietal lobe/<br>Precuneus       | R   | 7        | 9                    | -52 | 62  | 13.50            |
| SRN  | Anterior cingulate                          | L/R | 24/32    | -3                   | 38  | -6  | 30.84            |
|      | Medial frontal gyrus                        | L/R | 32       | 6                    | 44  | -10 | 16.38            |
|      | Medial frontal gyrus                        | L   | 9/10     | -6                   | 44  | -10 | 16.11            |
| DAN  | Inferior parietal lobule                    | L   | 7/39/40  | -39                  | -58 | 46  | 24.97            |
|      | Inferior parietal lobule                    | R   | 39/40    | 48                   | -70 | 38  | 13.12            |
|      | Middle frontal gyrus                        | L   | 8        | -36                  | 20  | 42  | 19.45            |
|      | Middle/Superior frontal<br>gyrus            | R   | 8/9      | 36                   | 20  | 50  | 9.20             |
| VAN  | Inferior/Middle temporal<br>gyrus           | R   | 20/21    | 60                   | -19 | -18 | 14.46            |
|      | Superior parietal lobule                    | R   | 7/19     | 33                   | -73 | 50  | 19.29            |
|      | Inferior parietal lobule                    | R   | 40       | 51                   | -55 | 38  | 30.62            |
|      | Middle frontal gyrus                        | R   | 6/8      | 48                   | 32  | 34  | 23.75            |
| DMN  | Posterior cingulate cortex                  | L/R | 23/31    | 9                    | -55 | 14  | 28.28            |
|      | Medial prefrontal cortex                    | L/R | 10       | -6                   | 56  | -2  | 16.88            |

|  |                            |   |       |     |     |     |       |
|--|----------------------------|---|-------|-----|-----|-----|-------|
|  | Inferior parietal cortex   | L | 39    | -48 | -70 | 34  | 11.65 |
|  | Inferior parietal cortex   | R | 39    | 45  | -67 | 34  | 12.71 |
|  | Temporal parietal junction | L | 20/21 | -54 | -4  | -22 | 8.09  |
|  | Temporal parietal junction | R | 20/21 | 60  | -1  | -26 | 10.38 |
|  | (Para)Hippocampus          | L | 28/35 | -27 | -25 | -22 | 5.30  |
|  | (Para)Hippocampus          | R | 28/35 | 30  | -25 | -22 | 5.80  |
