# Supplementary material for: Motor Imagery Learning Modulates Functional Connectivity of Multiple Brain Systems in Resting State
Source: PubMed Central journal article supplement (PMC3894973; doi:10.1371/journal.pone.0085489), 2014-01-17
Supplement: pone.0085489.s002.pdf [file pone.0085489.s002.pdf]

(a)

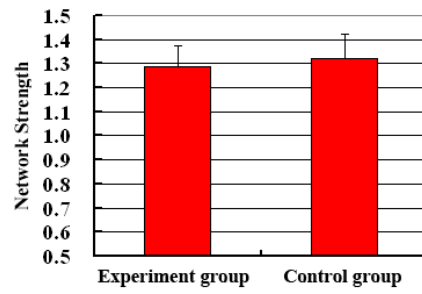

(b)

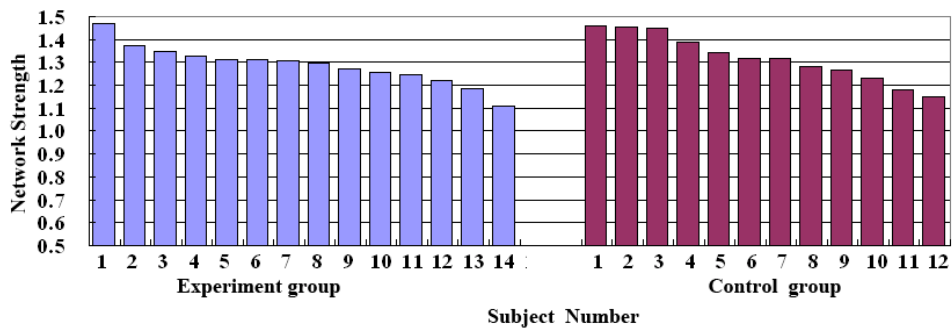

**Figure S1.** Baseline tests on the network strength of DMN between the experimental and control groups. (a) The group mean value of experiment/control group; (b) The individual value of experimental/ control group.
